# Supplementary material for: Changes in the Carbohydrate Profile in Common Buckwheat (Fagopyrum esculentum Moench) Seedlings Induced by Cold Stress and Dehydration
Source: MDPI journal article supplement (doi:10.3390/metabo13050672), 2023-05-19
Supplement: s1 [file s1]

# Changes in the Carbohydrate Profile in Common Buckwheat (*Fagopyrum esculentum* Moench) Seedlings Induced by Cold Stress and Dehydration

Lesław B. Lahuta, Ryszard J. Górecki, Joanna Szablińska-Piernik and Marcin Horbowicz

Department of Plant Physiology, Genetics and Biotechnology, University of Warmia and Mazury, Oczapowskiego 1a, 10-719 Olsztyn, Poland

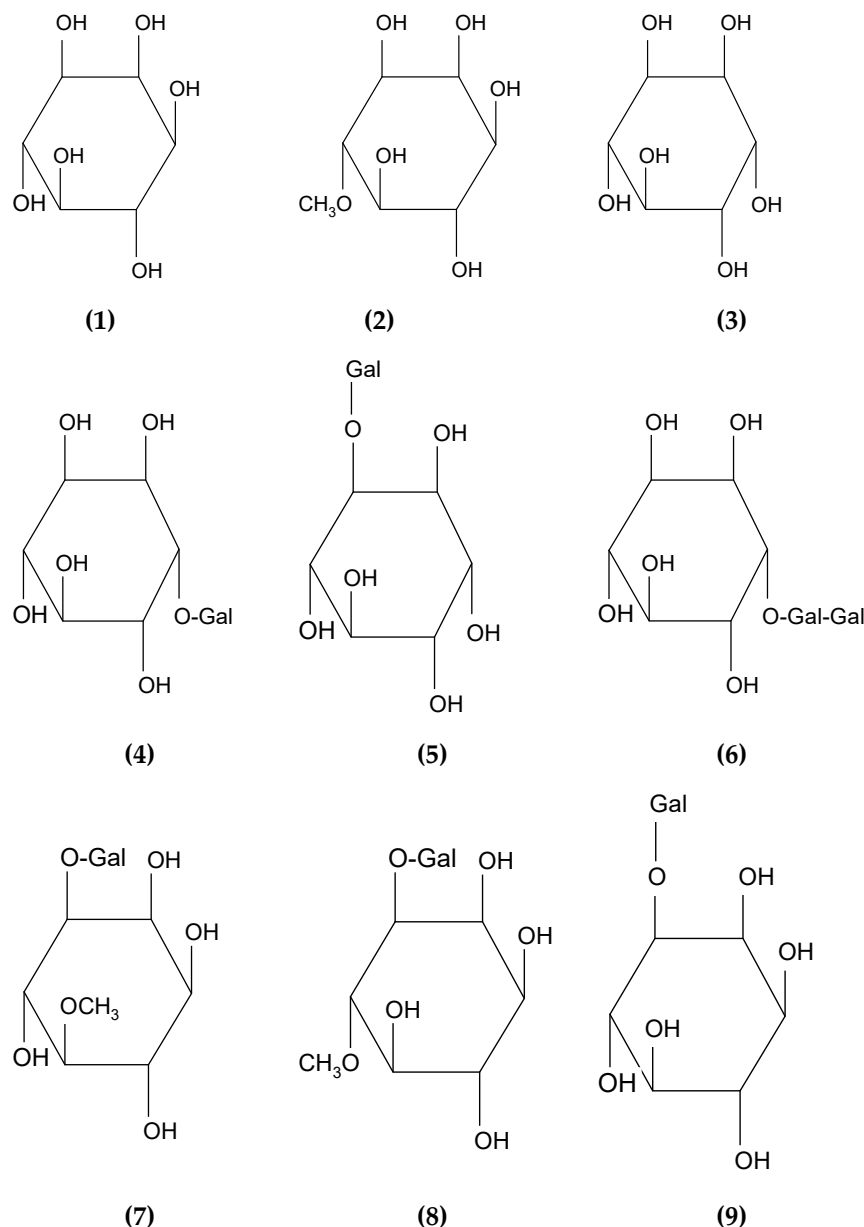

**Figure S1.** Chemical structures of cyclitols and their  $\alpha$ -galactosides found in buckwheat tissues. (1) *Myo*-inositol: *cis*-1,2,3,5-*trans*-4,6-cyclohexanehexol; (2) *D*-pinitol (1*D*-3-*O*-methyl-*D*-*chiro*-inositol); (3) *D*-*chiro*-inositol: *cis*-1,2,4-*trans*-4,6-cyclohexanehexol; (4) Fagopyritol A1 : *O*- $\alpha$ -*D*-galactopyranosyl-(1 $\rightarrow$ 3)-1 *D*-*chiro*-inositol; (5) Fagopyritol B1: *O*- $\alpha$ -*D*-galactopyranosyl-(1 $\rightarrow$ 2)-1*D*-*chiro*-inositol; (6) Fagopyritol A2: *O*- $\alpha$ -*D*-galactopyranosyl-(1 $\rightarrow$ 6)-*O*- $\alpha$ -*D*-galactopyranosyl-(1 $\rightarrow$ 3)-1*D*-*chiro*-inositol; (7) Galactopinitol A (*O*- $\alpha$ -*D*-galacto-pyranosyl-(1 $\rightarrow$ 2)-4-*O*-methyl-*D*-*chiro*-inositol); (8) Galactopinitol B (*O*- $\alpha$ -*D*-galacto-pyranosyl-(1 $\rightarrow$ 3)-3-*O*-methyl-*D*-*chiro*-inositol); (9) Galactinol: *O*- $\alpha$ -*D*-galactopyranosyl-(1 $\rightarrow$ 1)-*L*-*myo*-inositol.

### A. Roots

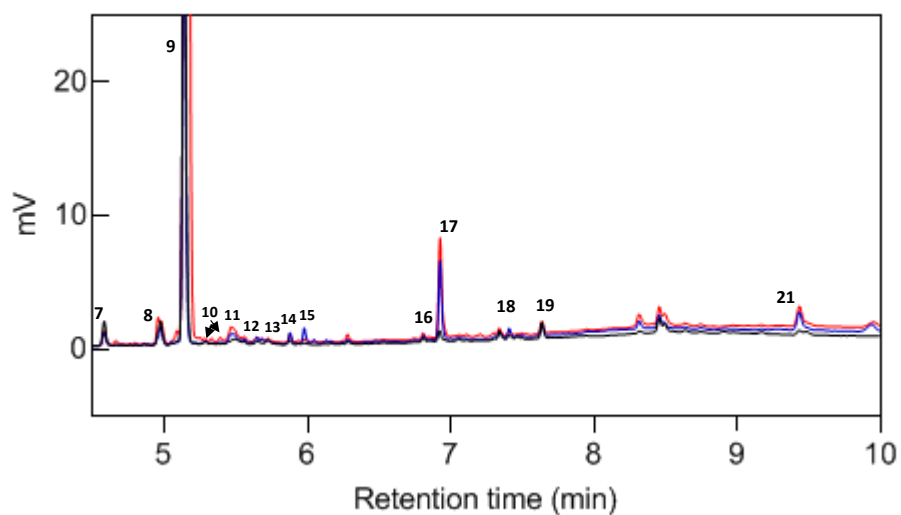

### B. Hypocotyl

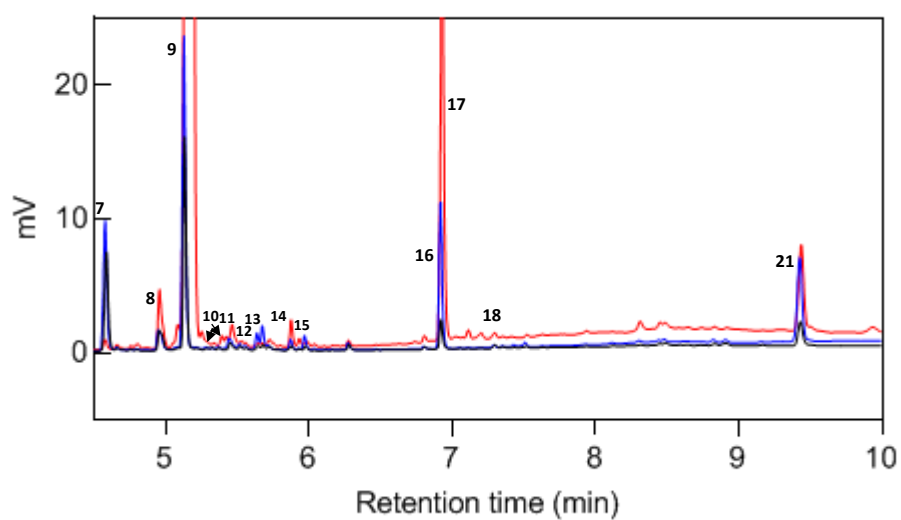

### C. Cotyledons

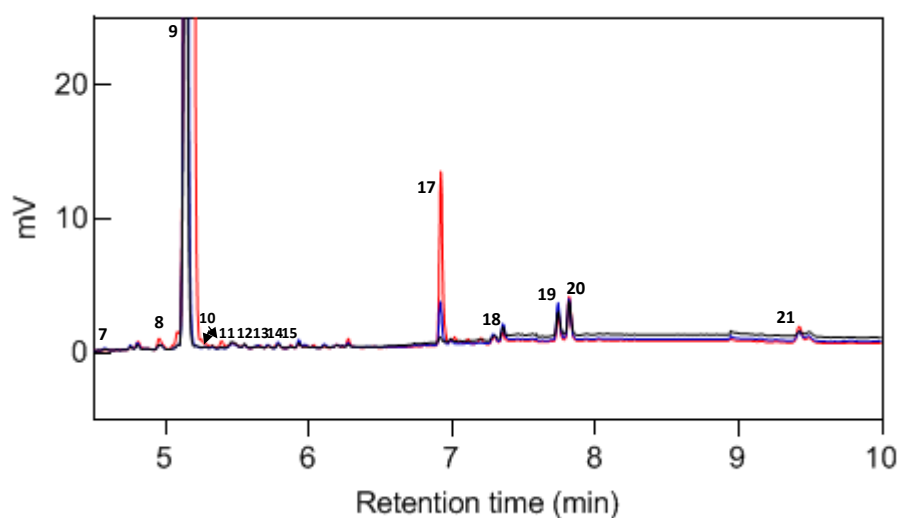

**Figure S2.** Part of saccharide chromatograms of roots (A), hypocotyl (B) and cotyledons (C). Description of peaks: 7 – NN1; 8 – NN2; 9 – Sucrose; 10 – Maltose; 11 – Galacto-pinitol A; 12 - Galactopinitol B; 13 – Fagopyritol A1; 14- Fagopyritol B1; 15 – NN3; 16 –

Galactinol; 17 – Raffinose; 18 – NN4; 19 – Fagopyritol A2; 20 – NN5; 21 – Stachyose. NN1 - NN5 - means not named (not known).  
 Black line – before cold stress or dehydration; Red line – after dehydration; Blue line – after cold stress

**Table S1.** Values of fresh weight, dry weight and organ length in buckwheat seedlings before and after cold stress and dehydration (mean  $\pm$  SD)

|                                | Before experiment | After cold stress | After dehydration |
|--------------------------------|-------------------|-------------------|-------------------|
| Fresh weight (mg/one seedling) |                   |                   |                   |
| Roots                          | 20.95 $\pm$ 1.75  | 20.98 $\pm$ 2.33  | 1.80 $\pm$ 0.11   |
| Hypocotyl                      | 22.24 $\pm$ 0.72  | 35.26 $\pm$ 1.65  | 1.75 $\pm$ 0.12   |
| Cotyledons                     | 13.64 $\pm$ 0.05  | 13.81 $\pm$ 0.18  | 4.04 $\pm$ 0.47   |
| Total                          | 56.83 $\pm$ 2.40  | 70.05 $\pm$ 3.55  | 7.59 $\pm$ 0.65   |
| Dry weight (mg/one seedling)   |                   |                   |                   |
| Roots                          | 1.69 $\pm$ 0.13   | 1.61 $\pm$ 0.10   | 1.69 $\pm$ 0.08   |
| Hypocotyl                      | 2.27 $\pm$ 0.11   | 3.44 $\pm$ 0.02   | 1.69 $\pm$ 0.12   |
| Cotyledons                     | 4.15 $\pm$ 0.16   | 3.26 $\pm$ 0.28   | 3.84 $\pm$ 0.45   |
| Total                          | 8.11 $\pm$ 0.45   | 8.31 $\pm$ 0.35   | 7.22 $\pm$ 0.55   |
| Dry weight (%)                 |                   |                   |                   |
| Roots                          | 8.07 $\pm$ 0.07   | 7.70 $\pm$ 0.39   | 93.8 $\pm$ 0.82   |
| Hypocotyl                      | 10.20 $\pm$ 0.21  | 9.75 $\pm$ 0.39   | 96.5 $\pm$ 0.12   |
| Cotyledons                     | 30.41 $\pm$ 0.32  | 23.58 $\pm$ 1.67  | 95.2 $\pm$ 0.05   |
| Length (mm)                    |                   |                   |                   |
| Roots                          | 76.8 $\pm$ 2.5    | 76.7 $\pm$ 2.7    | -                 |
| Hypocotyl                      | 16.5 $\pm$ 0.5    | 22.7 $\pm$ 1.0    | -                 |
